# Supplementary material for: Eco-Friendly Cerium–Cobalt Counter-Doped Bi2Se3 Nanoparticulate Semiconductor: Synergistic Doping Effect for Enhanced Thermoelectric Generation
Source: MDPI journal article supplement (doi:10.3390/nano13202738), 2023-10-10
Supplement: s1 [file s1]

## Supporting Information

# Eco-Friendly Cerium–Cobalt Counter-Doped Bi<sub>2</sub>Se<sub>3</sub> Nanoparticulate Semiconductor: Synergistic Doping Effect for Enhanced Thermoelectric Generation

Jamal-Deen Musah <sup>1,2</sup>, Siu Wing Or <sup>1,2,\*</sup>, Lingyan Kong <sup>3</sup>, Vellaisamy A. L. Roy <sup>4</sup> and Chi-man Lawrence Wu <sup>3</sup>

<sup>1</sup> Department of Electrical and Electronic Engineering, The Hong Kong Polytechnic University, Hong Kong, China; jamal-deen.musah@polyu.edu.hk

<sup>2</sup> Hong Kong Branch of National Rail Transit Electrification and Automation Engineering Technology Research Center, Hong Kong, China

<sup>3</sup> Department of Materials Science and Engineering, City University of Hong Kong, Hong Kong, China; lingyong6-c@my.cityu.edu.hk (L.K.); lawrence.wu@cityu.edu.hk (C.-m.L.W.)

<sup>4</sup> School of Science and Technology, Hong Kong Metropolitan University, Hong Kong, China; vroy@hkmu.edu.hk

\* Correspondence: eeswor@polyu.edu.hk

**Table S1.** The obtained peak position, d spacing, cell parameters, and lattice volume variations in the BCCS samples

| Samples   | d-spacing<br>(Å) | Cell parameters(Å) |         | Volume<br>(Å) <sup>3</sup> | FWHM, $\beta$<br>(°) |
|-----------|------------------|--------------------|---------|----------------------------|----------------------|
|           |                  | a = b              | c       |                            |                      |
| BS        | 2.0718           | 4.1418             | 28.6188 | 425.1601                   | 0.1908               |
| BCCS-0.01 | 2.0974           | 4.1817             | 27.7331 | 420.42862                  | 0.4348               |
| BCCS-0.05 | 2.0979           | 4.1832             | 27.7305 | 420.22979                  | 0.6130               |
| BCCS-0.15 | 2.0993           | 4.1832             | 27.7219 | 420.11504                  | 0.7662               |

**Table S2.** The calculated dislocation density induced by the counter doping for all the samples

| <b>Samples</b> | <b>Dislocation density (<math>10^{15}\text{m}^{-2}</math>)</b> |
|----------------|----------------------------------------------------------------|
| BS             | 0.6935                                                         |
| BCCS-0.01      | 3.501                                                          |
| BCCS-0.05      | 5.3756                                                         |
| BCCS-0.15      | 7.991                                                          |

**Table S3.** The stoichiometric calculation for all the synthesized samples

| Doping content | Bi    | Ce    | Co    | Se    | Stoichiometry                                                                   |
|----------------|-------|-------|-------|-------|---------------------------------------------------------------------------------|
| x = 0          | 2.017 | 0     | 0     | 2.983 | Bi <sub>2.017</sub> Se <sub>2.983</sub>                                         |
| x = 0.01       | 1.989 | 0.011 | 0.022 | 2.980 | Bi <sub>1.989</sub> Ce <sub>0.011</sub> Co <sub>0.022</sub> Se <sub>2.980</sub> |
| x = 0.05       | 1.948 | 0.052 | 0.04  | 2.973 | Bi <sub>1.948</sub> Ce <sub>0.052</sub> Co <sub>0.04</sub> Se <sub>2.973</sub>  |
| x = 0.15       | 1.852 | 0.148 | 0.120 | 2.951 | Bi <sub>1.852</sub> Ce <sub>0.148</sub> Co <sub>0.12</sub> Se <sub>2.951</sub>  |

**Table S4.** Binding energies, intercomponent (spin-orbit ) energy separations for the measured peaks in this study compared with the literature [1–3]

| Ce (III) 3d <sub>5/2</sub>                            |        | Ce(III) 3d <sub>3/2</sub> |        | Reference        |
|-------------------------------------------------------|--------|---------------------------|--------|------------------|
| $\nu^o$                                               | $\nu'$ | $u^o$                     | $u'$   |                  |
| 881.29                                                | 884.58 | 899.3                     | 903.01 | <b>This work</b> |
| 880.6                                                 | 885.4  | 898.9                     | 904.0  | [2]              |
| 880.9                                                 | 885.2  | 899.1                     | 903.4  | [3]              |
| <b>Inter-component (spin-orbit) energy separation</b> |        |                           |        |                  |
| $\Delta (\nu^o, u^o)$                                 |        | $\Delta (\nu', u')$       |        |                  |
| 18.1                                                  |        | 18.46                     |        | <b>This work</b> |
| 18.3                                                  |        | 18.6                      |        | [2]              |
| 18.2                                                  |        | 18.2                      |        | [3]              |

**Table S5.** The calculated effective mass of all the synthesized samples

| Samples   | Effective Mass ( $m_s^*$ ) |
|-----------|----------------------------|
| BS        | 0.074                      |
| BCCS-0.01 | 0.512                      |
| BCCS-0.05 | 1.269                      |
| BCCS-0.15 | 1.685                      |

**Table S6.** Comparison of pristine and doped  $\text{Bi}_2\text{Se}_3$  thermoelectric materials with this work.

| Composition                                                          | Synthesis             | Temperature (K) | PF ( $\mu\text{W/mK}$ ) | $\kappa_{\text{tot}}$ | zT    | Reference |
|----------------------------------------------------------------------|-----------------------|-----------------|-------------------------|-----------------------|-------|-----------|
| $\text{Bi}_{2-x}\text{Ce}_x\text{Co}_{2x/3}\text{Se}_3$              | Solvothermal          | 473             | 628                     | 0.539                 | 0.55  | This work |
| $\text{Bi}_{2-x}\text{Sb}_x\text{Se}_3$                              | Solvothermal          | 543             | 62                      | 0.37                  | 0.092 | [4]       |
| $\text{Bi}_2\text{Se}_3$                                             | Solution process      | 473             | 84                      | 0.62                  | 0.06  | [5]       |
| $\text{Bi}_{1.9}\text{In}_{0.1}\text{Sb}_{0.067}\text{Se}_3$         |                       | 473             | 305                     | 0.31                  | 0.472 |           |
| $\text{Ce}_{0.3}\text{Bi}_{1.7}\text{Se}_3$                          | Solvothermal          | 473             | 188                     | 0.52                  | 0.17  | [6]       |
| $\text{Bi}_2\text{Se}_3$                                             | Solvothermal          | 523             | 152                     | 0.83                  | 0.096 | [7]       |
| $\text{Bi}_{1.84}\text{Er}_{0.15}\text{Se}_{2.99}$                   | solvothermal          | 480             | 100                     | 0.41                  | 0.11  | [8]       |
| $(\text{Bi}_{0.96}\text{In}_{0.04})_2\text{Se}_{2.7}\text{Te}_{0.3}$ | Melting               | 350             | 1900                    | 2.4                   | 0.28  | [9]       |
| $\text{Bi}_2\text{Se}_3$                                             | Solution              | 480             | 200                     | 0.62                  | 0.17  | [10]      |
| $\text{Bi}_2\text{Se}_3$                                             | Bridgman method       | 320             | 410                     | 2.1                   | 0.063 | [11]      |
| $\text{Cu}_{0.01}\text{Bi}_{1.99}\text{Se}_3$                        | Melting and Hot press | 473             | 680                     | 0.8                   | 0.403 | [12]      |

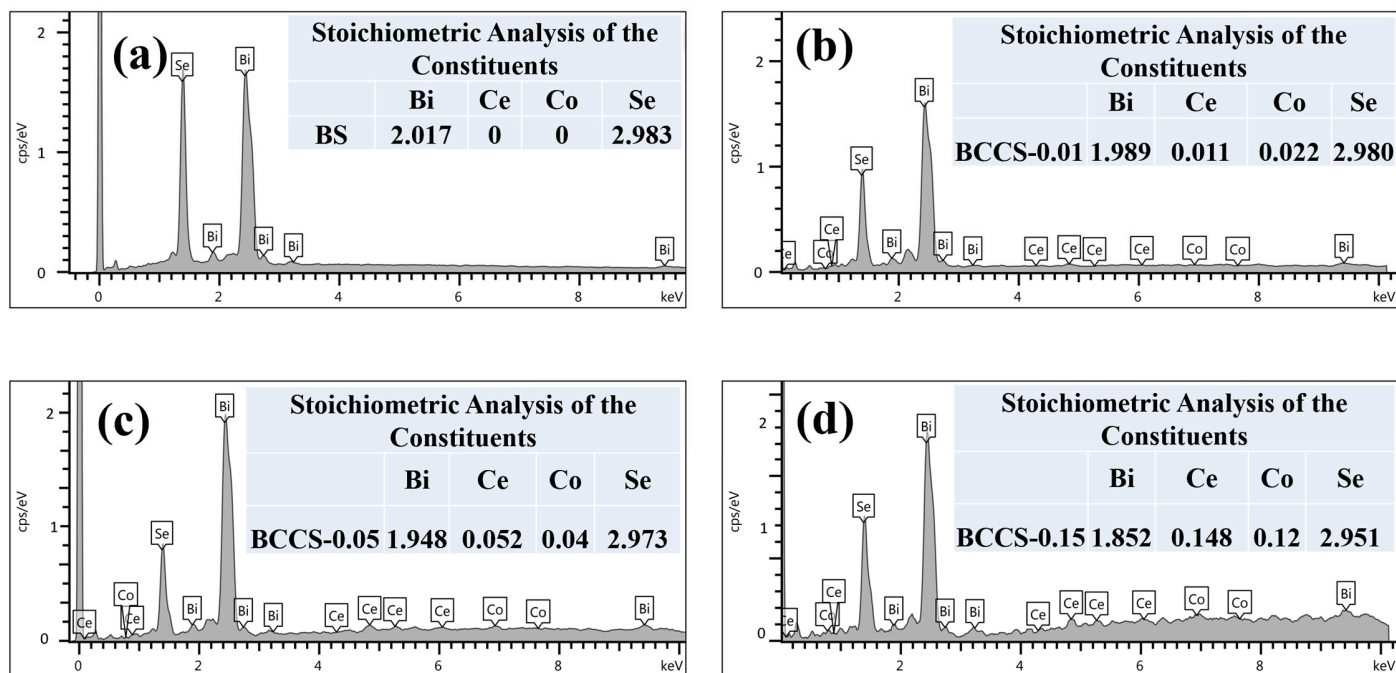

**Figure S1.** The EDX spectra of the BCCS samples (a)BS (b) BCCS-0.01 (c) BCCS-0.05 (d) BCCS-0.15

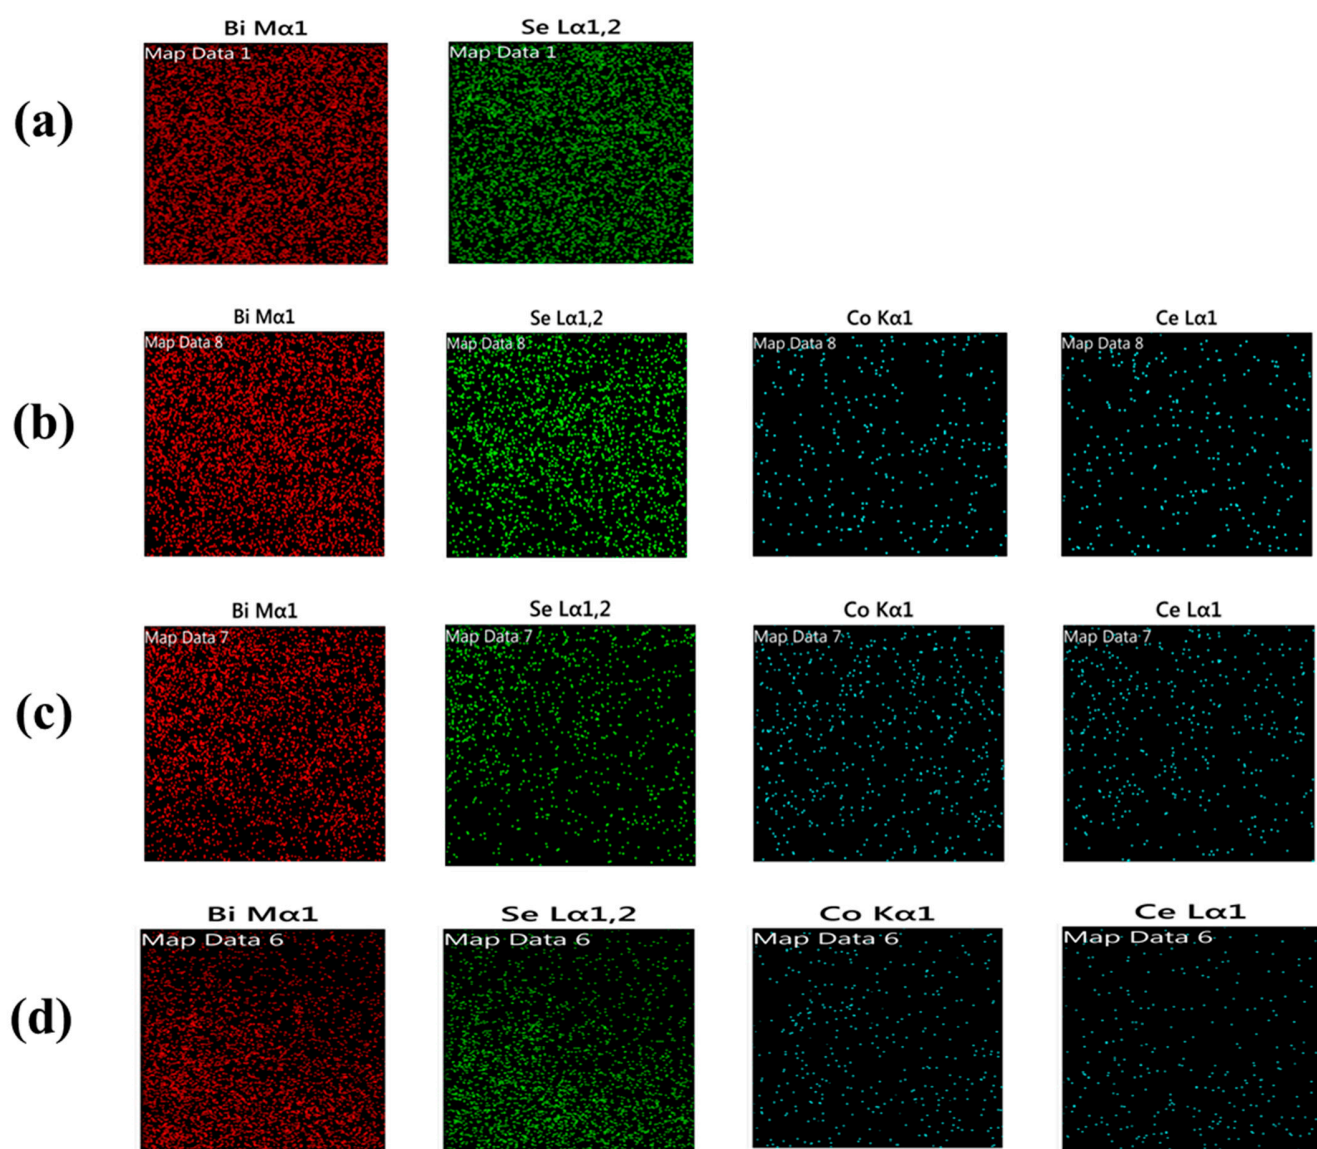

**Figure S2.** The EDX mapping of all the BCCS samples showing the presence of all the constituents (a)BS (b) BCCS-0.01 (c) BCCS-0.05 (d) BCCS-0.15

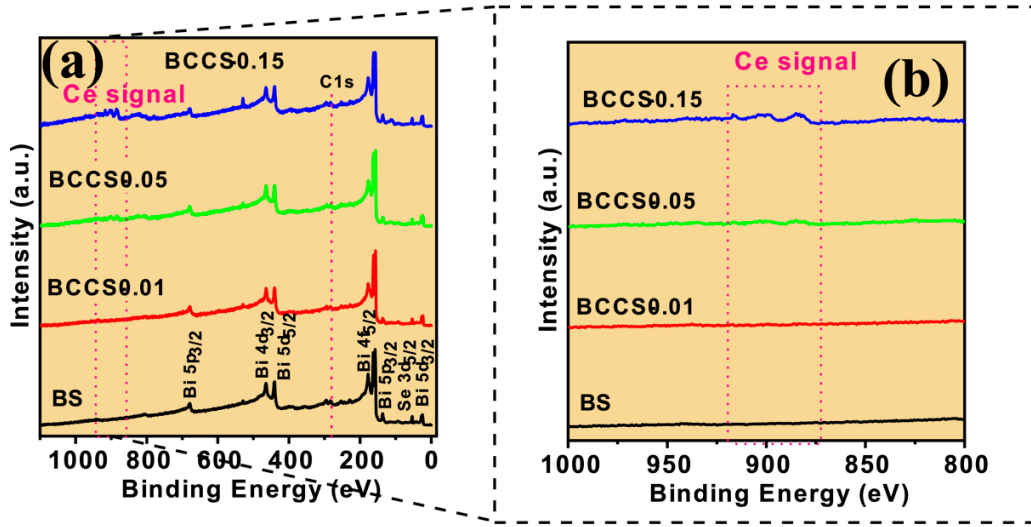

**Figure S3.** The Survey spectra of all synthesized samples (a) 100 nm full spectral (b) Enlarged scale showing the presence of the Ce dopants

#### Scattering Mechanism in the counter-doped samples

$$S = \frac{K_B}{e} \left[ r + \frac{5}{2} - \frac{E_F}{KT} \right] \text{-----(S1)}$$

where  $K_B$ ,  $e$ ,  $E_F$ ,  $T$ ,  $S$ , and  $r$  are the Boltzmann constant, electronic charge, Fermi energy, temperature, measure Seebeck coefficient and the scattering parameter. Notably,  $-1.5 \geq r \leq 1.5$

## References

- [1] Bêche, E.; Charvin, P.; Perarnau, D.; Abanades, S.; Flamant, G. Ce 3d XPS Investigation of Cerium Oxides and Mixed Cerium oxide ( $\text{Ce}_x\text{Ti}_y\text{O}_z$ ), *Surf. and Interface Anal.* 2008, 40, 264–267.
- [2] Paparazzo, E. On the Number, Binding Energies, and Mutual Intensities of Ce3d Peaks in the XPS Analysis of Cerium Oxide Systems: A Response to Murugan et al. *Superlatt. Microstruct.* 2015, 85, 321. *Superlattices and Microstruct.* 2017, 105, 216–220.
- [3] Wang, L.; Zhuang, L.; Xin, H.; Huang, Y.; Wang, D. Semi Quantitative Estimation of  $\text{Ce}^{3+}/\text{Ce}^{4+}$  ratio in YAG:  $\text{Ce}^{3+}$  Phosphor under Different Sintering Atmosphere. *Open J. Inorg. Chem.* **2015**, 5, 12–18.
- [4] Vijay, V.; Harish, S.; Archana, J.; Navaneethan, M. Synergistic Effect of Grain Boundaries and Phonon Engineering in Sb Substituted  $\text{Bi}_2\text{Se}_3$  Nanostructures for Thermoelectric Applications. *J. Colloid Interface Sci.* 2022, 612 97–110.
- [5] Musah, J.-D.; Linlin, L.; Guo, C.; Novitskii, A.; Ilyas, A.O.; Serhiienko, I.; Khovaylo, V.; Roy, V.A.L.; Wu, C.-M.L. Enhanced Thermoelectric Performance of Bulk Bismuth Selenide: Synergistic Effect of Indium and Antimony co-doping. *ACS Sustain. Chem. Eng.* **2022**, 10, 3862–3871.
- [6] Musah, J.-D.; Yanjun, X.; Ilyas, A.M.; Novak, T.G.; Jeon, S.; Arava, C.; Novikov, S.V.; Nikulin, D.S.; Xu, W.; Liu, L.; et al. Simultaneous enhancement of Thermopower and Electrical Conductivity through Isovalent Substitution of Cerium in Bismuth Selenide Thermoelectric Materials. *ACS Appl. Mater. Interfaces* **2019**, 11, 44026–44035.
- [7] Kadel, K.; Kumari, L.; Li, W.Z.; Huang, J.Y.; Provencio, P.P. Synthesis and Thermoelectric Properties of  $\text{Bi}_2\text{Se}_3$  Nanostructures. *Nanoscale Res Lett* **2011**, 6, 1–7.
- [8] Musah, J.; Ilyas, A.M.; Novitskii, A.; Serhiienko, I.; Egbo, K.O.; Saianand, G.; Khovaylo, V.; Kwo, S.; Man, K.; Roy, V.A.L. Effective Decoupling of Seebeck Coefficient and the Electrical Conductivity through Isovalent Substitution of Erbium in Bismuth Selenide Thermoelectric Material. *J. Alloys Compd.* **2020**, 857, 157559.
- [9] Hegde, G.S.; Prabhu, A.N.; Gao, Y.H.; Kuo, Y.K.; Reddy, V.R. Potential Thermoelectric Materials of Indium and Tellurium co-doped Bismuth Selenide Single Crystals Grown by Melt Growth Technique. *J. Alloys Compd.* 2021, 866, 158814.
- [10] Min, Y.; Roh, J.W.; Yang, H.; Park, M.; Kim, S. I; Hwang, S.; Lee, S.M.; Lee, K.H.; Jeong, U. Surfactant-Free Scalable Synthesis of  $\text{Bi}_2\text{Te}_3$  and  $\text{Bi}_2\text{Se}_3$  Nanoflakes and Enhanced Thermoelectric Properties of their Nanocomposites. *Adv. Mater.* 2013, 25, 1425–1429.
- [11] Dedi; Lee, P.C.; Wei, P.C.; Chen, Y.Y. Thermoelectric Characteristics of A Single-Crystalline Topological Insulator  $\text{Bi}_2\text{Se}_3$  Nanowire. *Nanomaterials* 2021, 11, 819.
- [12] Sun, G.; Qin, X.; Li, D.; Zhang, J.; Ren, B.; Zou, T.; Xin, H.; Paschen, S.B.; Yan, X. Enhanced Thermoelectric Performance of n-type  $\text{Bi}_2\text{Se}_3$  Doped with Cu, *J. Alloys Compd.* 639, 9–14.
